# Supplementary material
Source: PubMed Central journal article supplement (PMC4001090)
Supplement: NIHMS569074-supplement-figure_s2.pdf [file NIHMS569074-supplement-figure_s2.pdf]

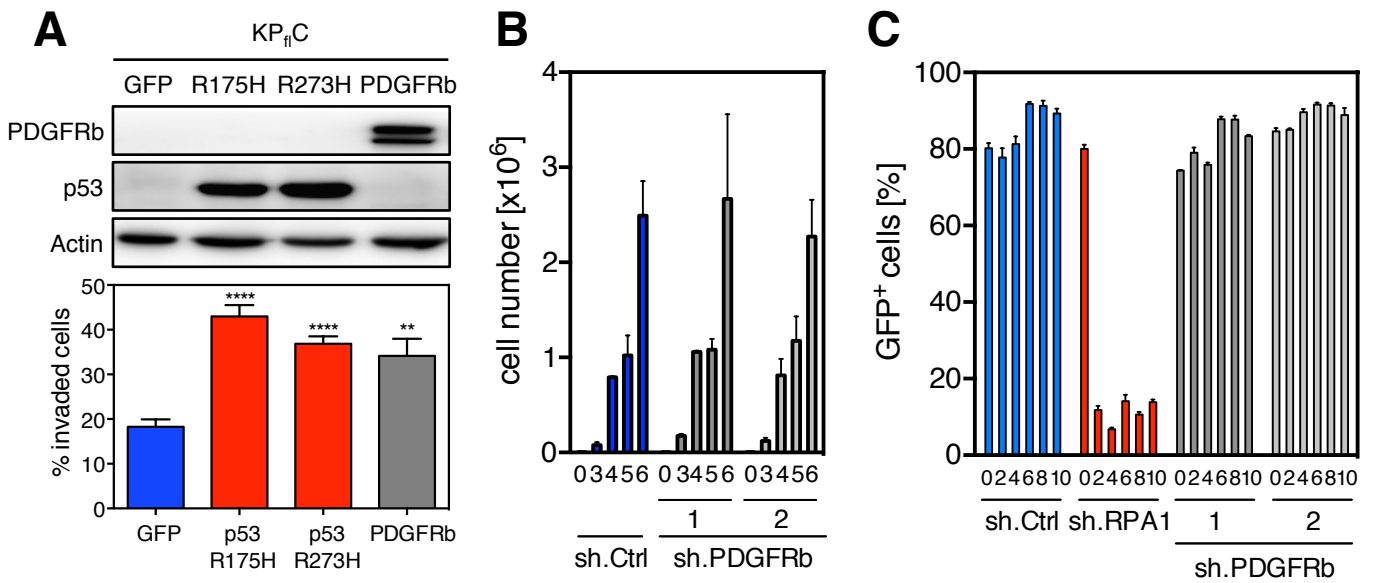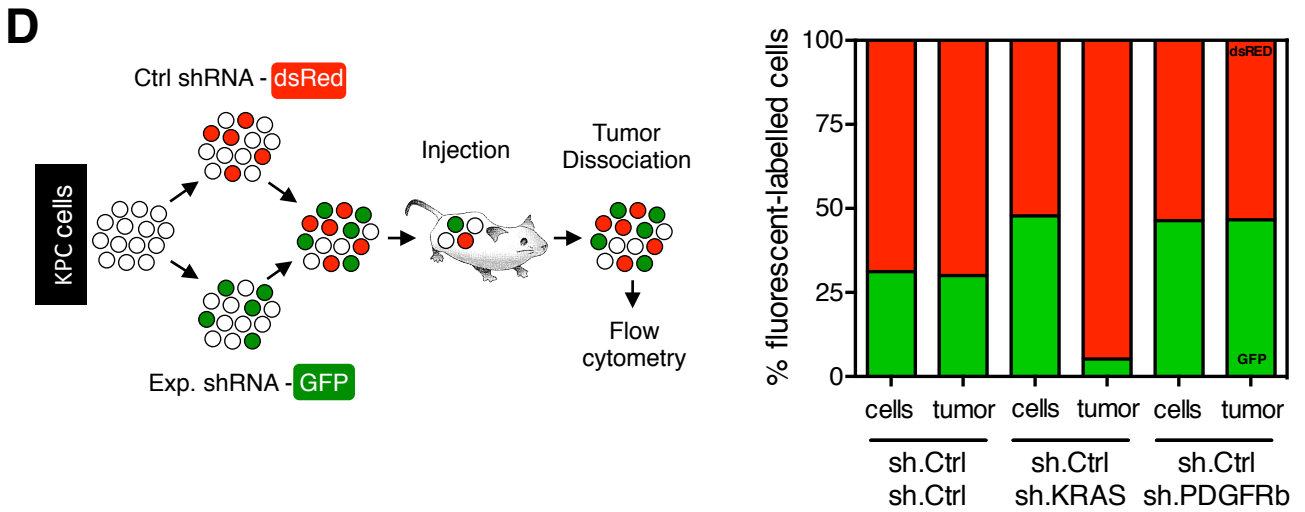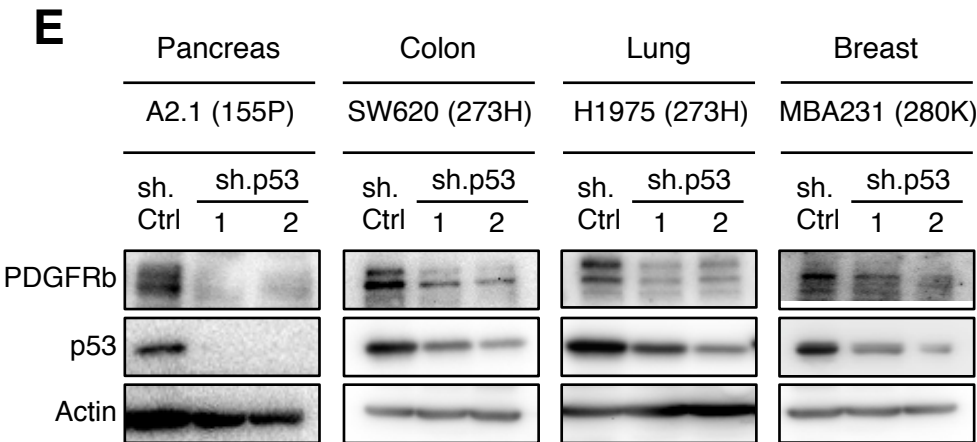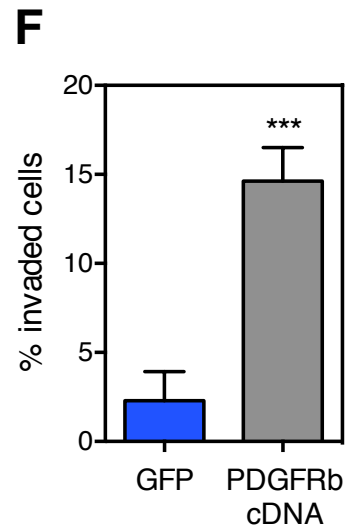

Suppl. Figure 2
