# Supplementary material
Source: PubMed Central journal article supplement (PMC4001090)

**A**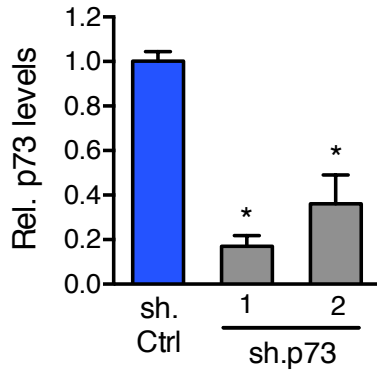**B**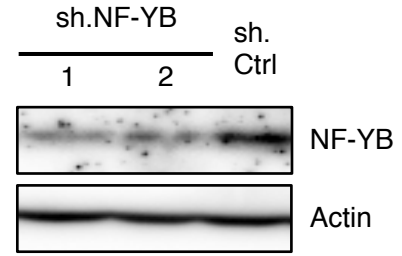**C**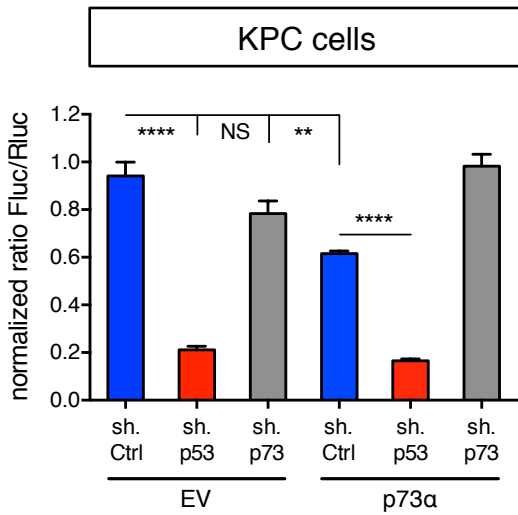**D**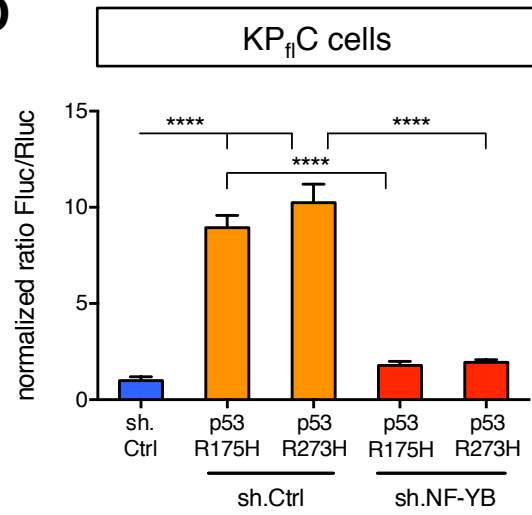**E**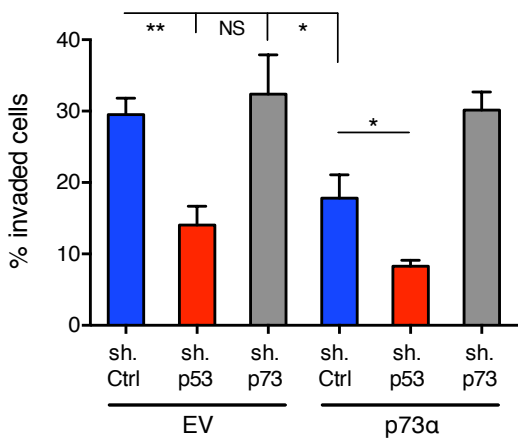**F**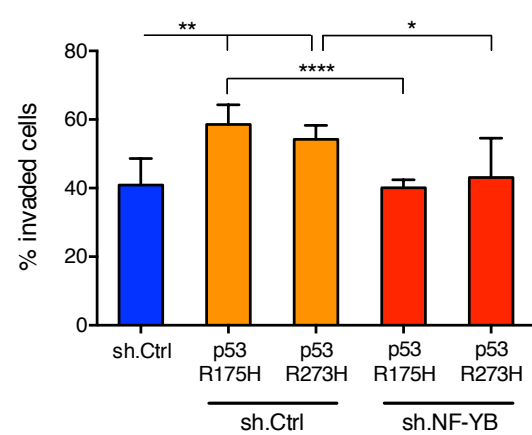

Supplement: NIHMS569074-supplement-figure_s3.pdf [file NIHMS569074-supplement-figure_s3.pdf]
