# Supplementary material
Source: PubMed Central journal article supplement (PMC4001090)

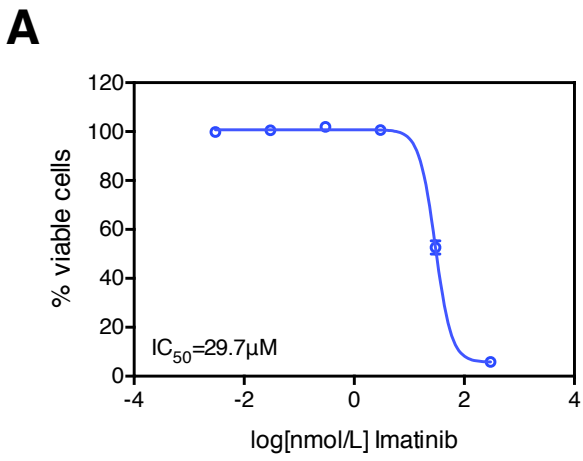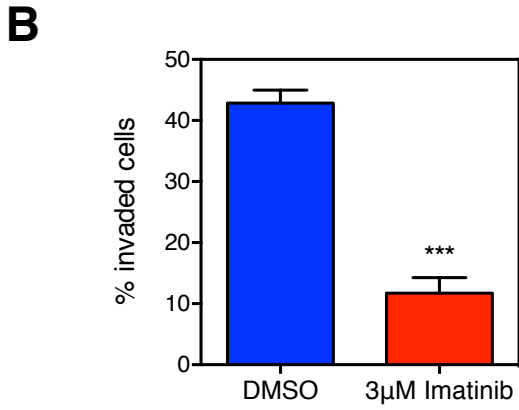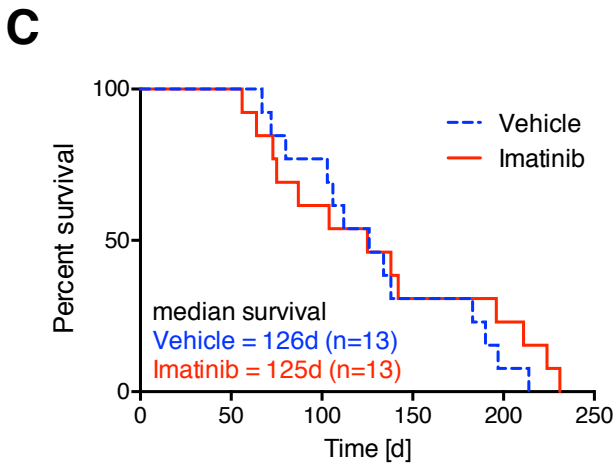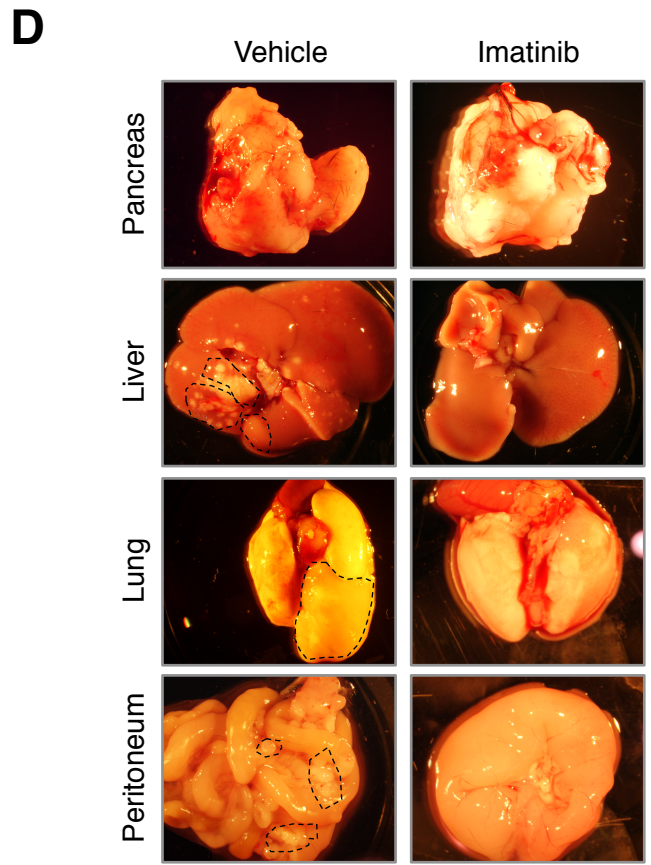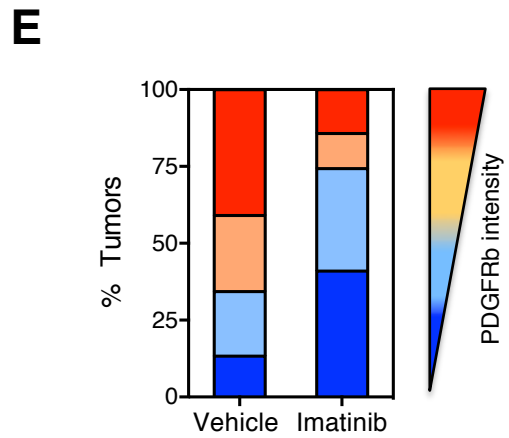

Supplement: NIHMS569074-supplement-figure_s5.pdf [file NIHMS569074-supplement-figure_s5.pdf]
